## RESEARCH ARTICLE

# Cross-cultural translation and psychometric validation of the French version of the Fear-Avoidance Components Scale (FACS)

Arnaud Duport<sup>1,2</sup>, Sonia Bédard<sup>3,4</sup>, Catherine Raynauld<sup>3,4</sup>, Martine Bordeleau<sup>1,2</sup>, Randy Neblett<sup>5</sup>, Frédéric Balg<sup>3,4</sup>, Hervé Devanne<sup>1‡</sup>, Guillaume Léonard<sup>2,6‡\*</sup>

**1** URePSSS—Unité de Recherche Pluridisciplinaire Sport Santé Société, ULR 7369, Université du Littoral Côte d'Opale, Université d'Artois, Université de Lille, Calais, France, **2** Research Center on Aging, CIUSSS de l'Estrie-CHUS, Sherbrooke, Québec, Canada, **3** Centre de recherche du CHUS, CIUSSS de l'Estrie-CHUS, Sherbrooke, Québec, Canada, **4** Surgery Department, Orthopedic Service, Université de Sherbrooke, Sherbrooke, Québec, Canada, **5** PRIDE Research Foundation, Dallas, TX, United States of America, **6** School of Rehabilitation, Faculty of Medicine and Health Sciences, Université de Sherbrooke, Sherbrooke, Canada

☉ These authors contributed equally to this work.

‡ HD and GL also contributed equally to this work.

\* [guillaume.leonard2@usherbrooke.ca](mailto:guillaume.leonard2@usherbrooke.ca)

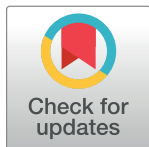

## OPEN ACCESS

**Citation:** Duport A, Bédard S, Raynauld C, Bordeleau M, Neblett R, Balg F, et al. (2023) Cross-cultural translation and psychometric validation of the French version of the Fear-Avoidance Components Scale (FACS). PLoS ONE 18(10): e0288899. <https://doi.org/10.1371/journal.pone.0288899>

**Editor:** Fatih Özden, Mugla Sitki Kocman Universitesi, TURKEY

**Received:** July 12, 2023

**Accepted:** September 20, 2023

**Published:** October 12, 2023

**Copyright:** © 2023 Duport et al. This is an open access article distributed under the terms of the [Creative Commons Attribution License](https://creativecommons.org/licenses/by/4.0/), which permits unrestricted use, distribution, and reproduction in any medium, provided the original author and source are credited.

**Data Availability Statement:** Data cannot be shared publicly due to restrictions imposed by the ethics committee, as data sharing was not mentioned in the consent form. Data are available from the Research Center on Aging du Centre Intégré Universitaire de Santé et de Services Sociaux de l'Estrie – Centre hospitalier universitaire de Sherbrooke (CIUSSS de l'Estrie CHUS) Ethics Committee (contact via [ethique.recherche.ciusse-chus@sss.gouv.qc.ca](mailto:ethique.recherche.ciusse-chus@sss.gouv.qc.ca)) for researchers who meet the criteria for access to confidential data.

## Abstract

### Background

The Fear-Avoidance Components Scale (FACS) is a reliable and valid instrument widely used to assess fear-avoidance beliefs related to pain and disability. However, there is a scarcity of validated translations of the FACS in different cultural and linguistic contexts, including the French population. This study aimed to translate and validate the French version of the FACS (FACS-Fr/CF), examining its psychometric properties among French-speaking individuals.

### Methods

A cross-cultural translation process—including forward translation, backward translation, expert committee review, and pre-testing—was conducted to develop the FACS-Fr/CF. The translated version was administered to a sample of French-speaking adults ( $n = 55$ ) with chronic musculoskeletal pain. Internal consistency (including confirmatory analyses of the 2 factors identified in the Serbian version), test-retest reliability and convergent validity were then assessed.

### Results

The FACS-Fr/CF demonstrated high global internal consistency ( $\alpha = 0.94$ , 95% CI: 0.91–0.96) as well as high internal consistency of the 2 factors identified in the Serbian version ( $\alpha = 0.90$ , 95% CI: 0.86–0.94 and  $\alpha = 0.90$ , 95% CI: 0.85–0.94, respectively). Test-retest analysis revealed a moderate (close to high) reliability (ICC = 0.89; 95% CI: 0.82–0.94 and  $r = 0.89$ ;  $p < 0.005$ ). Convergent validity was supported by significant correlations between the

**Funding:** This study was funded by the Fond de recherche et enseignement en orthopédie de Sherbrooke (FREOS). GL received salary support by the Fonds de recherche du Québec – Santé (FRQS, Senior clinical research scholar). Funders had no role in study design, data collection and analysis, decision to publish, or preparation of the manuscript.

**Competing interests:** NO - The authors have declared that no competing interests exist.

FACS-Fr/CF scores and the Tampa Scale for Kinesiophobia ( $r = 0.82$ ;  $p < 0.005$ ), the Pain Catastrophizing Scale ( $r = 0.72$ ;  $p < 0.005$ ) and the Hospital Anxiety and Depression Scale ( $r = 0.66$ ;  $p < 0.005$ ).

## Conclusion

The present study provides evidence for the cross-cultural translation and psychometric validation of the FACS-Fr/CF. The FACS-Fr/CF exhibits a high internal consistency, a moderate (close to high) test-retest reliability, and good construct validity, suggesting its utility in assessing fear-avoidance beliefs in the French-speaking population. This validated tool can enhance the assessment and understanding of fear-avoidance behaviors and facilitate cross-cultural research in pain-related studies.

## Introduction

The fear-avoidance (FA) model is proposed as a possible explanation for the transition from acute to chronic pain in some patients [1, 2]. According to this model, individuals who perceive their pain as threatening and who catastrophize will tend to develop fear of pain, avoid regular activities, and monitor excessively bodily sensations [1, 3, 4]. These responses may precipitate physical deconditioning, limit the ability to work and to participate in recreational/familial activities, and foster depression [1, 3, 4].

Several patient-reported outcome (PRO) questionnaires have been developed to quantify FA related concepts, including the Tampa Scale for Kinesiophobia (TSK) [5], the Pain Anxiety Symptoms Scale (PASS) [6], the Pain Catastrophizing Scale (PCS) [7], and the Fear-Avoidance Beliefs Questionnaire (FABQ) [8]. However, the FA model has significantly evolved in recent years, and none of these questionnaires comprehensively examine all the cognitive, emotional, and behavioral components of the model [9]. Although they have been used in a substantial number of peer-reviewed published research, the psychometric properties of these tools (including construct validity and sensitivity to change) have sometimes been called into question [10], and some of their items have received criticism for being either too narrowly defined (only applicable to a single situation) or overly broad (too vague or subject to interpretation) [11]. Furthermore, while pain-related avoidance can occur due to fear of injury or reinjury, fear of increased pain, or an actual increase in pain, none of these questionnaires attempt to distinguish between these different cases [12].

In an attempt to address these shortcomings, Neblett et al. (2015) have developed the Fear Avoidance Component Scale (FACS) [9], which includes items from other published FA related measures (TSK, PASS, PCS, FABQ). The FACS also includes items based on the Injustice Experience Questionnaire (IEQ) [13], designed to assess the degree to which chronic pain sufferers feel injustice in relation to their pain. All FACS items were created to assess specific fear avoidance related beliefs and feelings about a person's painful medical condition, such as cognitive (pain catastrophizing), affective (pain-related fear and anxiety), and behavioral (avoidance) constructs [9]. In addition, six items (15 to 20) were developed to assess the specific types of activities and physical intensity of activities (from low to strenuous) that an individual avoids, and three items were developed to evaluate why the individual is avoiding these activities [9].

The original English version of the FACS has shown acceptable test-retest reliability ( $r = 0.90$ – $0.94$ ) as well as acceptable internal consistency (Cronbach  $\alpha = 0.92$ ) [9]. The FACS

has been translated and validated in several different languages. It has shown good psychometric properties in Serbian (test-retest reliability: ICC = 0.93; internal consistency: Cronbach  $\alpha$  = 0.90) [14], Spanish (convergent validity:  $r$  = 0.41; internal consistency: Cronbach  $\alpha$  = 0.90–0.88) [15], Gujarati (test-retest reliability: ICC = 0.92; internal consistency: Cronbach  $\alpha$  = 0.83) [16], Dutch (internal consistency: Cronbach  $\alpha$  = 0.92; test-retest reliability: ICC = 0.92, CI 0.80–0.96) [17] and Turkish (internal consistency: Cronbach  $\alpha$  = 0.815; test-retest reliability: ICC = 0.53–0.97).

There are currently about 321 million French speakers throughout the world [18]. However, a psychometrically validated French version of the FACS has not been made available to date. Clinical settings in French-speaking parts of the world—including France and Canada—could certainly benefit from a French version of this questionnaire. The aim of the current study was to translate the FACS into a common French version, including dialects of France and Canadian French (FACS-Fr/CF), and to assess the psychometric properties of the translated questionnaire—including internal consistency, test-retest reliability, and construct validity.

## Materials and methods

The study was approved by the ethics committee of the Research Center on Aging du Centre Intégré Universitaire de Santé et de Services Sociaux de l'Estrie—Centre hospitalier universitaire de Sherbrooke (CIUSSS de l'Estrie CHUS) and registered on the ClinicalTrials website (NCT05217017). This study was conducted according to the principles expressed in the Declaration of Helsinki [19].

## Cross-cultural translation process

The translation was performed using a six-step process according to the guidelines for the cross-cultural adaptation process written by the American Association of Orthopaedic Surgeons and the Institute for Work & Health [20]. Before embarking on the cross-cultural translation process, we obtained permission from the original designers of FACS. Initial translation, synthesis, back translation, expert committee, test of the prefinal version and submission of the final version of the document to the one of the original developers (RN) were performed. For the initial translation, two independent translators (ST and SW), whose mother tongue was French, translated the scale from English to French. A synthesized version of the two translated questionnaires was completed after discussion with the translator and research team. Two independent translators (BVD and AS), blinded to the original scale and whose native language was English, then translated the synthesized version back to English. An expert committee, comprised of the four translators and the research team, consolidated the prefinal version.

The content validity of the French FACS was pre-tested by 10 healthcare professionals (including physiotherapists, nurses, neuropsychiatrists, and orthopedic surgeons) and 20 individuals (pain-free participants and painful patients including 10 in Quebec (Canada), and 10 in France). All of them tested the prefinal version by completing the questionnaire and evaluating their understanding of each item. Each person was invited to report any interpretation difficulties and other observations about each test item [20]. Based on participants' answers, only item 13 « *La douleur causée par mon état de santé est un signal d'alerte indiquant que quelque chose ne va pas du tout chez moi* » (“The pain from my medical condition is a warning signal that something is dangerously wrong with me”) turned into « *La douleur causée par mon état de santé est un signal d'alerte indiquant que quelque chose ne va pas du tout* » (“The pain from my medical condition is a warning signal that something is dangerously wrong”). This

modification was made because of the end of the sentence (« *chez moi* »), suggesting a psychiatric disorder connotation in French. For the final step, the methods for obtaining the corrected French version (FACS-Fr/CF) were submitted to author (RN), one of the developers of the original FACS questionnaire (Fig 1). The cross-cultural translation process period ran from March 14, 2022 to March 31, 2022.

## Psychometric evaluation of the FACS-Fr/CF

After cross-cultural adaptation and translation, the final version of the FACS-Fr/CF questionnaire was administered to a sample of participants suffering from chronic pain to evaluate internal consistency, test-retest reliability, and convergent validity. This validation step was performed according to specialized pain medicine guidelines [21].

**Study population.** The target population for this study included patients with chronic musculoskeletal pain who spoke French as their first language and referred by a physician for a musculoskeletal condition at the hospital CIUSSS de l'Estrie-CHUS (convenience sampling method). The eligibility criteria were: 1) 18 years of age or older; 2) French as first language; and 3) chronic musculoskeletal pain for at least 3 months. Subjects were excluded if they were unable to consent, read or understand the study requirements (see Fig 2). The inclusion period ran from April 26, 2022 to November 1, 2022.

**Sample size.** Sample size was determined on the basis of previous studies—all with a subject to item ratio greater than or equal to 2 [22]—and on the basis of other similar studies involving the French translation of comparable tools [23, 24]. Thus, we recruited 55 participants to meet the objectives of this study (50+10% loss) for the assessment of internal consistency, reliability and validity. This percentage of loss to follow-up was based on the latest research at the CHUS orthopedic service and on a systematic review focused on orthopedic clinical services [25].

**Patient-reported outcome measures.** The FACS is a self-reported questionnaire used to comprehensively measure and identify major FA components in patients with painful medical conditions based on the most recent FA model [9, 11]. This questionnaire consists of 20 items on a Likert scale, ranging from 5 (completely agree) to 0 (completely disagree). The total score, which varies from 0 to 100, is calculated by adding the values of each item. The FACS includes 5 severity levels with increasing severity, based upon quintiles: Subclinical (0 to 20), Mild (21 to 40), Moderate (41 to 60), Severe (61 to 80), and Extreme (81 to 100). Psychometric properties of the FACS show high internal consistency ( $\alpha = 0.92$ ) and high test-retest reliability ( $r = 0.90-0.94$ ,  $P < 0.01$ ) [9]. The Serbian version of FACS found 2 different factors; factor 1 dealt with “general fear avoidance” and included items 1–14, while factor 2 was related to “types of activities that are avoided” and included items 15–20 [14].

The Tampa Scale for Kinesiophobia—Canadian French version (TSK-CF) is a self-reported questionnaire used to assess kinesiophobia. The TSK-CF has demonstrated good psychometric properties (Cronbach's  $\alpha = 0.71$  and ICC  $> 0.7$ ) [26, 27]. This questionnaire consists of 17-items evaluated on a Likert scale, ranging from 1 (strongly disagree) to 4 (strongly agree). The total score, which varies from 17 to 68, is calculated by adding the values of each item. There is no specific threshold to indicate a clinically disabling level of kinesiophobia [28].

The Pain Catastrophizing Scale—Canadian French version (PCS-CF) is a self-reported questionnaire used to measure catastrophic thoughts. The PCS-CF has shown good psychometric properties (Cronbach's  $\alpha = 0.87$  and ICC  $> 0.7$ ) [7, 29–31]. This questionnaire consists of 13 items, rated on a Likert scale from 0 (not at all) to 4 (always), that can be categorized into three subscales: rumination (being unable to stop thinking about how much it hurts), amplification (exaggerating the threat value of pain sensations), and feelings of helplessness

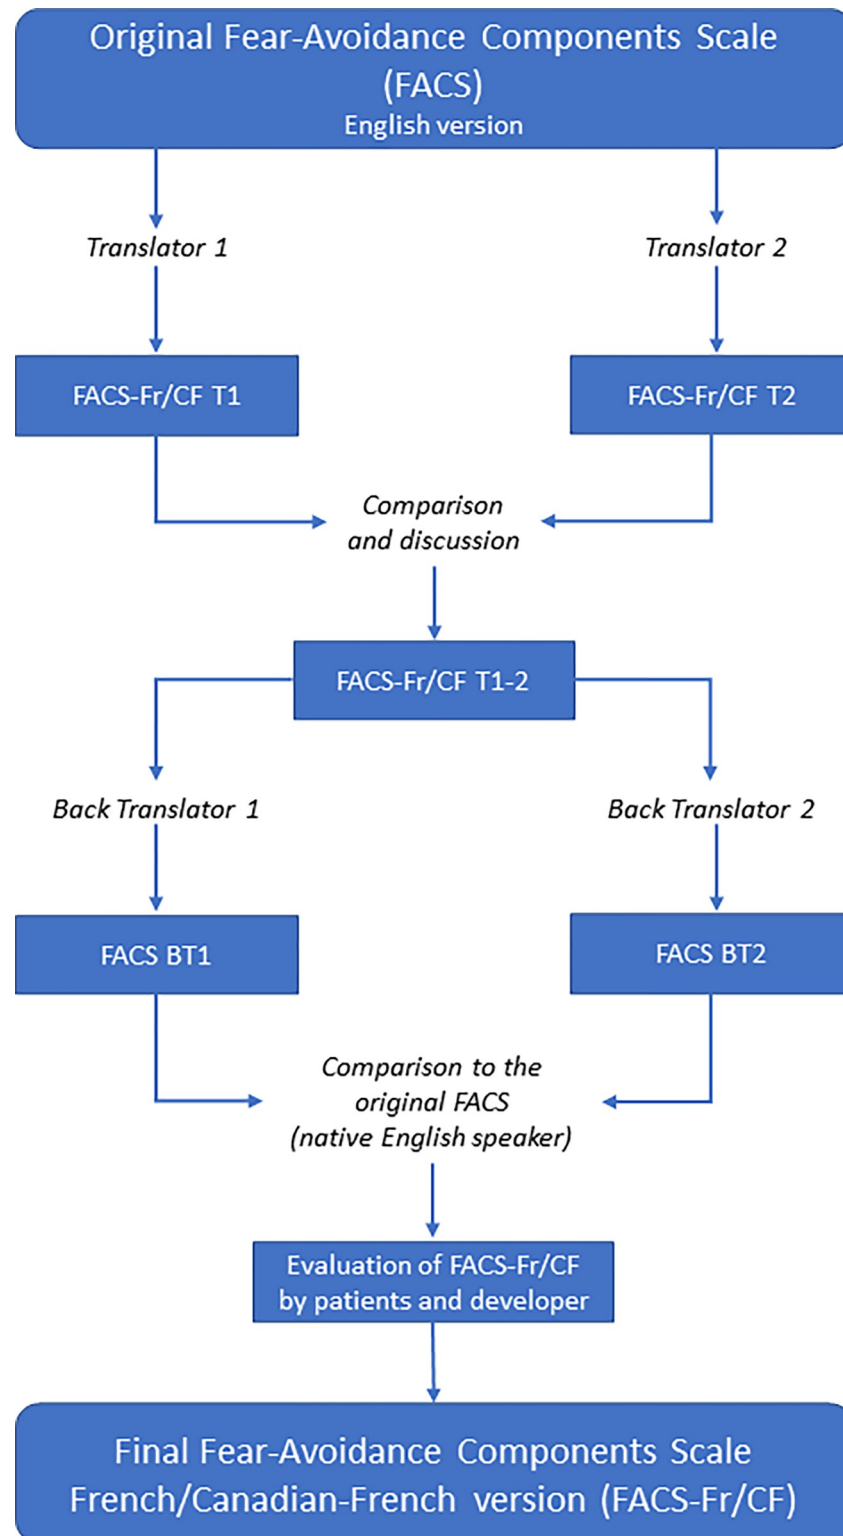

**Fig 1. Flowchart of the development of the FACS-Fr/CF.**

<https://doi.org/10.1371/journal.pone.0288899.g001>

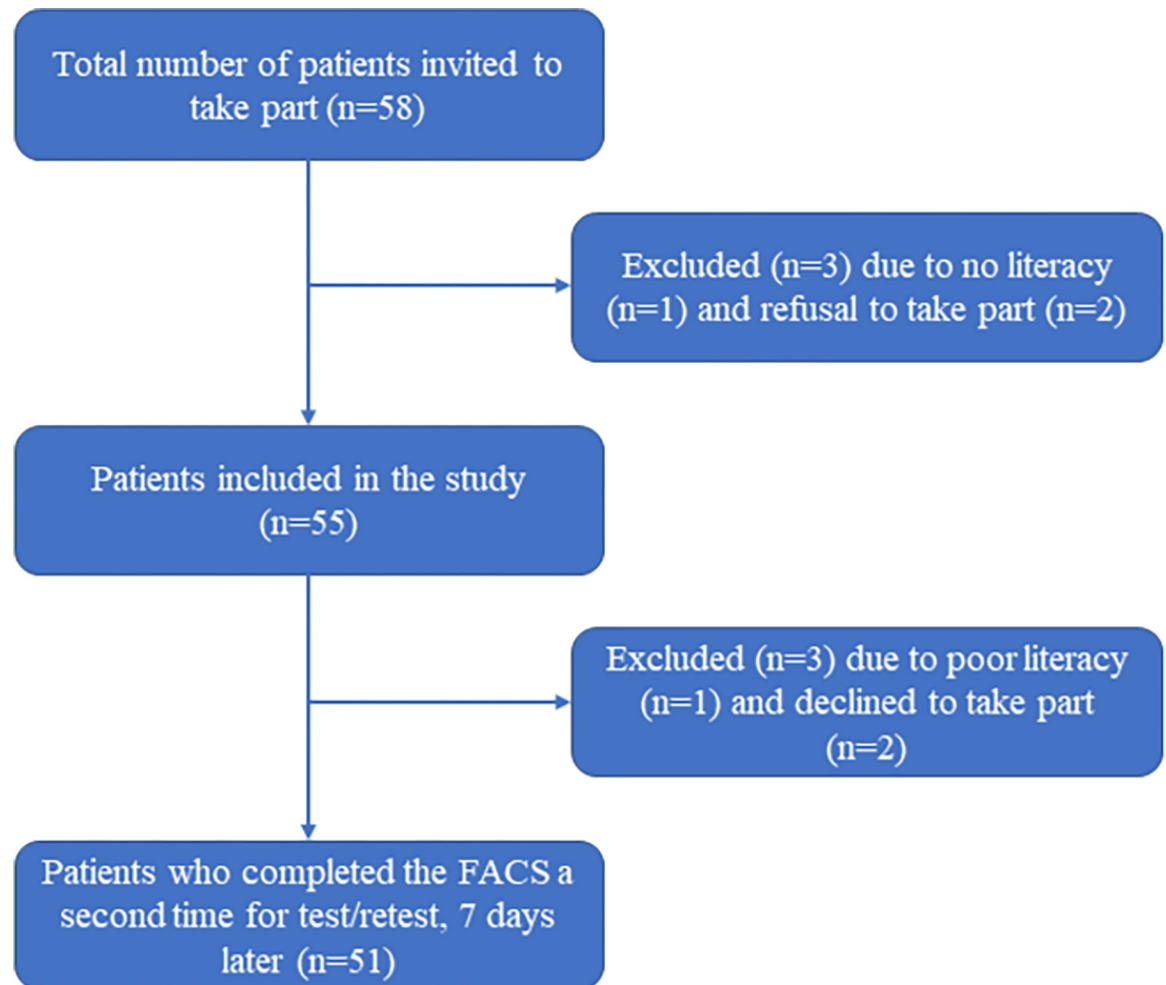

**Fig 2. Patient recruitment flowchart.**

<https://doi.org/10.1371/journal.pone.0288899.g002>

(feeling unable to cope with pain) [32]. The sum of the 13 items' values yields the final score, which ranges from 0 to 52. It has been suggested that a threshold score of 30 or higher can be used to identify people who have a clinically significant level of pain catastrophizing [33].

The Hospital Anxiety and Depression Scale—French Canadian version (HADS-FC) is a self-reported questionnaire used to measure the symptoms of anxiety and depression [34]. This questionnaire consists of 14 items intended to evaluate the severity of anxiety and depressive symptoms on two different subscales using a 4-point Likert-type scale (ranging between 0 and 3). Higher scores on the total scale indicate greater psychological distress. The internal consistency of the French version is good [35], with the depression subscale having Cronbach's alpha of 0.78 and the anxiety subscale having a Cronbach's alpha of 0.81.

**Study process and procedures.** Participants were recruited during an initial medical consultation visit at the orthopedic clinic of the CIUSSS de l'Estrie—CHUS. After the orthopedist completed the examination and written informed consent to participate was obtained, patients were asked to complete a short sociodemographic questionnaire (including sex, age, physician's diagnosis, pain duration and academic level) using an online REDCap platform (REDCap 12.4.2 - © 2023 Vanderbilt University) [36]. Patients were then asked to fill out the four questionnaires (FACS-Fr/CF, TSK-CF, PCS-CF, HADS-CF). The questionnaires were

completed online (REDCap) or on paper, depending on the participants' convenience or preference.

Then, seven days later, the patients were asked to complete the FACS-Fr/CF a second time, in the same way as the first time (online or paper). This timeframe was short enough to avoid significant clinical fluctuations from first completion and allow an appropriate test-retest evaluation [37].

**Statistical analysis.** Cronbach's alpha was used to assess the global internal consistency of the FACS-Fr/CF. We performed a global and confirmatory factors analysis (1 and 2) of the Serbian version. According to Wind *et al.*, 2005,  $\alpha \geq 0.80$ ,  $\alpha \geq 0.70$  and  $\alpha < 0.70$  are considered as high, moderate and low, respectively [38].

The reliability was calculated with test-retest intraclass correlation coefficients (ICC) and Pearson correlation coefficients. According to Wind *et al.*, 2005,  $ICC \geq 0.90$ ,  $ICC \geq 0.75$  and  $ICC < 0.75$  are considered as high, moderate and low, respectively [38].

Convergent validity was assessed using Pearson's correlation coefficients, comparing the FACS-Fr/CF with the TSK-CF, the PCS-CF, and the HADS-FC. According to Wind *et al.*, 2005,  $r \geq 0.60$ ,  $r \geq 0.30$  and  $r < 0.30$  are considered as high, moderate and low, respectively [38]. Considering the constructs of these different questionnaires, we expected to find stronger correlations with TSK-CF, followed by the PCF-CF and the HADS-FC.

All statistical analyses were performed using SPSS<sup>®</sup> (version 21); the significance level set at  $p = 0.05$ .

## Results

### Clinical characteristics of patients

Clinical characteristics of patients are provided in Table 1. Fifty-five (55) participants took part in the study, including 30 men (54.5%) and 25 women (45.5%). The average age for the total sample was  $51.15 \pm 16.47$  years old. The average pain duration was  $65.67 \pm 86.80$  months. The clinical diagnoses of the patients are given in Table 1. One subject each, for the remaining 10

**Table 1. Clinical characteristics of patients.**

| Characteristics                  | Total sample or mean (% or SD)                                                                                                                        |
|----------------------------------|-------------------------------------------------------------------------------------------------------------------------------------------------------|
| Age (years)                      | 51.15 (16.47)                                                                                                                                         |
| Sex                              | 30 men (54.5%)<br>25 women (45.5%)                                                                                                                    |
| Diagnosis                        | Arthrosis (12)<br>Tendinopathy (9)<br>Coxalgia (8)<br>Ligamentoplasty (6)<br>Labrum tear (5)<br>Tendon rupture (3)<br>Low back pain (2)<br>Other (10) |
| Pain duration (months)           | 65.67 (86.80)                                                                                                                                         |
| FACS-Fr/CF (at first time)       | 47.35 (22.85)                                                                                                                                         |
| PCF-CF                           | 19.40 (13.81)                                                                                                                                         |
| TSK-CF                           | 40.94 (9.71)                                                                                                                                          |
| HADS-FC                          | 13.49 (8.06)                                                                                                                                          |
| FACS-Fr/CF (retest 7 days later) | 45.43 (21.84)                                                                                                                                         |

<https://doi.org/10.1371/journal.pone.0288899.t001>

patients, were diagnosed with the following: stenosing flexor tenosynovitis, femur elongation, cervical surgery, elbow fracture, ankle pain, complex regional pain syndrome (CRPS), neuropathy of upper limbs, patellofemoral syndrome, Baker's cyst, crowned dens syndrome. The study ended on November 11, 2022 with the receipt of the last questionnaire.

### Internal consistency

The global internal consistency of FACS-Fr/CF calculated by Cronbach's alpha was high ( $\alpha = 0.94$ , 95% CI: 0.91–0.96). For factors 1 and 2, the Cronbach's alpha was high for both ( $\alpha = 0.90$ , 95% CI: 0.86–0.94 and  $\alpha = 0.90$ , 95% CI: 0.85–0.94 respectively). The descriptive statistics and internal consistency for the FACS-Fr/CF items are shown in [Table 2](#).

### Reliability test retest

Test-retest reliability of the FACS-Fr/CF was moderate, close to high (ICC = 0.89; 95% CI: 0.82–0.94 and  $r = 0.89$ ;  $p < 0.005$ ).

### Convergent validity

The convergent validity was assessed with Pearson's correlation coefficients (unilateral). The FACS-Fr/CF scores were highly correlated with scores on the TSK-CF ( $r = 0.82$ ;  $p < 0.005$ ), PCS-CF ( $r = 0.72$ ;  $p < 0.005$ ) and HADS-FC ( $r = 0.66$ ;  $p < 0.005$ ). All correlation coefficients are shown in [Table 3](#).

## Discussion

This study aimed to establish and validate a cross cultural adaptation of the FACS questionnaire in French and Canadian French, using the guidelines for questionnaires in pain

**Table 2. Internal consistency for the FACS-Fr/CF items.**

| FACS-Fr/CF items | Corrected total-item correlation | Cronbach's alpha if item deleted |
|------------------|----------------------------------|----------------------------------|
| 1                | .475                             | .934                             |
| 2                | .519                             | .934                             |
| 3                | .643                             | .931                             |
| 4                | .693                             | .930                             |
| 5                | .677                             | .931                             |
| 6                | .451                             | .935                             |
| 7                | .641                             | .931                             |
| 8                | .740                             | .930                             |
| 9                | .708                             | .930                             |
| 10               | .641                             | .931                             |
| 11               | .727                             | .930                             |
| 12               | .299                             | .938                             |
| 13               | .516                             | .934                             |
| 14               | .617                             | .932                             |
| 15               | .634                             | .932                             |
| 16               | .722                             | .930                             |
| 17               | .617                             | .932                             |
| 18               | .826                             | .928                             |
| 19               | .695                             | .930                             |
| 20               | .652                             | .931                             |

<https://doi.org/10.1371/journal.pone.0288899.t002>



**Table 3. Pearson's correlations (2-tailed) among PROs.**

|                      | FACS-Fr/CF <sup>a</sup> | PCS-CF <sup>b</sup> | TSK-CF <sup>c</sup> |
|----------------------|-------------------------|---------------------|---------------------|
| PCS-CF <sup>b</sup>  | 0.72***                 | -                   |                     |
| TSK-CF <sup>c</sup>  | 0.82***                 | 0.61***             | -                   |
| HADS-FC <sup>d</sup> | 0.66***                 | 0.69***             | 0.66***             |

\*\*\* means  $p < 0.005$

<sup>a</sup>Fear Avoidance Components Scale—French/Canadian French version

<sup>b</sup>Pain Catastrophizing Scale—Canadian French version

<sup>c</sup>Tampa Scale for Kinesiophobia—Canadian French version

<sup>d</sup>Hospital Anxiety and Depression Scale—French Canadian version

<https://doi.org/10.1371/journal.pone.0288899.t003>

medicine proposed by Tsang, Royse and Terkawi [21]. Following a forward and backward translation process, and feedback from 10 healthcare professionals and 20 patients, a final version of the FACS-Fr/CF was established. The psychometric properties were then assessed in a sample of 55 chronic pain patients who completed the final FACS-Fr/CF on 2 occasions at a 2-week interval, as well as 3 other questionnaires, which assessed related constructs.

Global internal consistency of FACS-Fr/CF was high ( $\alpha = 0.94$ ), and comparable to the original FACS ( $\alpha = 0.92$ ) [9]. The internal consistency of the 2 factors identified previously in the Serbian version was also high, despite the relatively small number of items for factor 2. Test-retest reliability of the FACS-Fr/CF was moderate, very close to high. These values are consistent with those obtained for the original version ( $r = 0.90$ – $0.94$ ,  $P < 0.01$ ) [9].

For convergent validity, we assessed the relationship between the scores of the FACS-Fr/CF, the TSK-CF, the PCS-CF and the HADS-FC. A previous study with the Spanish and Turkish versions of the FACS found a moderate and strong correlation with the Spanish and Turkish version of the TSK, with a coefficient  $r = 0.39$  and  $r = 0.56$  respectively [39, 40]. In the present study, we observed a high correlation between the FACS-Fr/CF and the TSK-CF ( $r = 0.82$ ). As expected, the correlation was higher with the TSK-CF, compared to the PCS-CF ( $r = 0.72$ ) and the HADS-FC ( $r = 0.66$ ), suggesting that the constructs underlying the FACS and TSK are particularly close [9]. This finding is perhaps not so surprising when we bear in mind that some of the items from the FACS were borrowed directly from the TSK [9].

We also examined the convergent validity of FACS, by assessing its relationship with the PCS. In previous studies, the Spanish version showed a moderate correlation with the PCS ( $r = 0.49$  to  $0.53$ ) [39, 41], and the Serbian and Turkish versions showed a high correlation ( $r = 0.77$  and  $r = 0.68$  respectively) [14, 40]. The high correlation between the FACS-Fr/CF and PCS-CF ( $r = 0.72$ ;  $p < 0.005$ ) was very close to the Serbian and Turkish versions.

FA is frequently associated with anxiety [42] and depression [43]. Though anxiety and depression are related to FA, these constructs are somewhat different [44]. The association between FACS-Fr/CF and HADS-FC scores was therefore expected to be weaker than those observed between the FACS-Fr/CF and TSK-CF, and between the FACS-Fr/CF and PCS-CF.

All in all, the pattern of convergent validity results in the present study is consistent with the a priori assumptions that postulated a higher correlation coefficient between FACS-Fr/CF and TSK-CF scores [45, 46], followed by the PCS-CF (with symptoms of helplessness, rumination and magnification being an important component of the FA model [7]) and by the HADS-FC [47].

This work provides an important basis for the future use of the FACS-Fr/CF in assessing fear-avoidance beliefs in various French-speaking cultural contexts.

This study has a number of strengths and limitations. One strength was that the American Association of Orthopedic Surgeons and the Consensus-based Standards for the Selection of

Health Measurement Instruments recommendations were followed in the cross-cultural adaptation and validation process. Furthermore, the FACS-Fr/CF was developed as a standardized version, accommodating two distinct French language dialects (France and Canada). As a result, it has potential for broad applicability across diverse French-speaking regions, worldwide. However, it is important to exercise caution when using the instrument in specific contexts, as further validation studies may be necessary to ensure its appropriateness for local linguistic variations and cultural nuances.

An important limitation of this study concerns recruitment, as the 55 patients included in the sample were recruited from a single hospital—a situation that may raise questions about the generalizability of the results. However, it is important to note that this limitation may be partially mitigated by the important variability observed among the pain conditions encompassed within the sample. Nonetheless, extrapolating the results to broader chronic pain populations, outside the specific context of the study, should be done with caution.

## Conclusions

This is the first translation, intercultural adaptation and validation study of the FACS in French version, including dialects of France and Canadian French. The FACS-Fr/CF showed a high global internal consistency and moderate (very close to high) test-retest reliability. The convergent validity of the FACS-Fr/CF was demonstrated by positive correlations with TSK, PCS and HADS.

## Supporting information

**S1 File. Fear-Avoidance Components Scale, French/Canadian French version (FACS-Fr/CF).**  
(PDF)

## Acknowledgments

We would especially like to thank Doctor Stéphane Ricard and the orthopedic service of CIUSSS de l'Estrie-CHUS for recruiting participants, as well as Professor Cynthia Gagnon for her help with the translation process.

## Author Contributions

**Conceptualization:** Arnaud Duport, Sonia Bédard, Catherine Raynauld.

**Data curation:** Sonia Bédard, Catherine Raynauld, Frédéric Balg.

**Formal analysis:** Arnaud Duport.

**Funding acquisition:** Sonia Bédard, Frédéric Balg, Guillaume Léonard.

**Investigation:** Arnaud Duport, Sonia Bédard.

**Methodology:** Arnaud Duport, Sonia Bédard, Martine Bordeleau.

**Project administration:** Arnaud Duport, Sonia Bédard, Catherine Raynauld, Guillaume Léonard.

**Resources:** Arnaud Duport, Frédéric Balg, Guillaume Léonard.

**Software:** Arnaud Duport.

**Supervision:** Arnaud Duport.

**Validation:** Arnaud Duport, Sonia Bédard.

**Visualization:** Arnaud Duport, Sonia Bédard.

**Writing – original draft:** Arnaud Duport, Sonia Bédard, Catherine Raynauld, Martine Bordeleau, Randy Neblett, Frédéric Balg, Hervé Devanne, Guillaume Léonard.

**Writing – review & editing:** Arnaud Duport, Sonia Bédard, Martine Bordeleau, Randy Neblett, Frédéric Balg, Hervé Devanne, Guillaume Léonard.

## References

1. Vlaeyen JWS, Linton SJ. Fear-avoidance and its consequences in chronic musculoskeletal pain: a state of the art. *Pain*. 2000/04/27 ed. 2000; 85: 317–332. [https://doi.org/10.1016/S0304-3959\(99\)00242-0](https://doi.org/10.1016/S0304-3959(99)00242-0) PMID: 10781906
2. Lethem J, Slade PD, Troup JD, Bentley G. Outline of a Fear-Avoidance Model of exaggerated pain perception—I. *Behav Res Ther*. 1983; 21: 401–408. [https://doi.org/10.1016/0005-7967\(83\)90009-8](https://doi.org/10.1016/0005-7967(83)90009-8) PMID: 6626110
3. Vlaeyen JWS, Kole-Snijders AMJ, Rotteveel AM, Ruesink R, Heuts PHTG. The role of fear of movement/(re)injury in pain disability. *J Occup Rehab*. 1995; 5: 235–252. <https://doi.org/10.1007/BF02109988> PMID: 24234727
4. Vlaeyen JW, Linton SJ. Fear-avoidance model of chronic musculoskeletal pain: 12 years on. *Pain*. 2012; 153: 1144–1147. <https://doi.org/10.1016/j.pain.2011.12.009> PMID: 22321917
5. Miller RP, Kori SH, Todd DD. The Tampa Scale: a measure of kinesiophobia. *The Clinical journal of pain*. 1991; 7: 51.
6. McCracken LM, Zayfert C, Gross RT. The Pain Anxiety Symptoms Scale: development and validation of a scale to measure fear of pain. *Pain*. 1992; 50: 67–73. [https://doi.org/10.1016/0304-3959\(92\)90113-P](https://doi.org/10.1016/0304-3959(92)90113-P) PMID: 1513605
7. Sullivan MJL, Bishop SR, Pivik J. The Pain Catastrophizing Scale: Development and validation. *Psychological Assessment*. 1995; 7: 524–532. <https://doi.org/10.1037//1040-3590.7.4.524>
8. Waddell G, Newton M, Henderson I, Somerville D, Main CJ. A Fear-Avoidance Beliefs Questionnaire (FABQ) and the role of fear-avoidance beliefs in chronic low back pain and disability. *Pain*. 1993; 52: 157–168. [https://doi.org/10.1016/0304-3959\(93\)90127-B](https://doi.org/10.1016/0304-3959(93)90127-B) PMID: 8455963
9. Neblett R, Mayer TG, Hartzell MM, Williams MJ, Gatchel RJ. The Fear-avoidance Components Scale (FACS): Development and Psychometric Evaluation of a New Measure of Pain-related Fear Avoidance. *Pain Pract*. 2016; 16: 435–450. <https://doi.org/10.1111/papr.12333> PMID: 26228238
10. Lundberg M, Grimby-Ekman A, Verbunt J, Simmonds MJ. Pain-related fear: a critical review of the related measures. *Pain Res Treat*. 2011; 2011: 494196. <https://doi.org/10.1155/2011/494196> PMID: 22191022
11. Pincus T, Smeets RJEM, Simmonds MJ, Sullivan MJL. The fear avoidance model disentangled: Improving the clinical utility of the fear avoidance model. *Clin J Pain*. 2010; 26: 739–746. <https://doi.org/10.1097/AJP.0b013e3181f15d45> PMID: 20842017
12. Rainville J, Smeets RJEM, Bendix T, Tveito TH, Poiradeau S, Indahl AJ. Fear-avoidance beliefs and pain avoidance in low back pain—translating research into clinical practice. *Spine J*. 2011; 11: 895–903. <https://doi.org/10.1016/j.spinee.2011.08.006> PMID: 21907633
13. Sullivan MJ, Adams H, Horan S, Maher D, Boland D, Gross R. The role of perceived injustice in the experience of chronic pain and disability: scale development and validation. *J Occup Rehabil*. 2008/06/10 ed. 2008; 18: 249–61. <https://doi.org/10.1007/s10926-008-9140-5> PMID: 18536983
14. Knezevic A, Neblett R, Gatchel RJ, Jeremic-Knezevic M, Bugarski-Ignjatovic V, Tomasevic-Todorovic S, et al. Psychometric validation of the Serbian version of the Fear Avoidance Component Scale (FACS). *PLoS One*. 2018; 13: e0204311. <https://doi.org/10.1371/journal.pone.0204311> PMID: 30248127
15. Cuesta-Vargas AI, Neblett R, Gatchel RJ, Roldán-Jiménez C. Cross-cultural adaptation and validity of the Spanish fear-avoidance components scale and clinical implications in primary care. *BMC Fam Pract*. 2020; 21: 44. <https://doi.org/10.1186/s12875-020-01116-x> PMID: 32106823
16. Bid DD, Neblett R, Alagappan TR, Patel CJ, Patel KN, Patel RL, et al. Cross-cultural adaptation, reliability, and validity of the Gujarati fear-avoidance components scale. *Physiotherapy-The Journal of Indian Association of Physiotherapists*. 2020; 14: 98.

17. De Baets L, Sergooris A, Neblett R, Matheve T, Mingels S, Van Goethem A, et al. The development and measurement properties of the Dutch version of the fear-avoidance components scale (FACS-D) in persons with chronic musculoskeletal pain. *Scand J Pain*. 2022. <https://doi.org/10.1515/sjpain-2022-0046> PMID: 36513392
18. Organisation internationale de la Francophonie. La langue française dans le monde, Synthèse 2022. Consulted on: 2022-10-07. Available at: [https://www.francophonie.org/sites/default/files/2022-03/Synthese\\_La\\_langue\\_francaise\\_dans\\_le\\_monde\\_2022.pdf](https://www.francophonie.org/sites/default/files/2022-03/Synthese_La_langue_francaise_dans_le_monde_2022.pdf). Gallimard. 2022.
19. WMA—The World Medical Association—Déclaration d'Helsinki de L'AMM—Principes éthiques applicables à la recherche médicale impliquant des êtres humains. [cited 24 Nov 2020]. Available: <https://www.wma.net/fr/policies-post/declaration-dhelsinki-de-lamm-principes-ethiques-applicables-a-la-recherche-medicale-impliquant-des-etres-humains/>
20. Beaton DE, Bombardier C, Guillemin F, Ferraz MB. Guidelines for the process of cross-cultural adaptation of self-report measures. *Spine (Phila Pa 1976)*. 2000; 25: 3186–3191. <https://doi.org/10.1097/00007632-200012150-00014> PMID: 11124735
21. Tsang S, Royse CF, Terkawi AS. Guidelines for developing, translating, and validating a questionnaire in perioperative and pain medicine. *Saudi J Anaesth*. 2017; 11: S80–S89. [https://doi.org/10.4103/sja.SJA\\_203\\_17](https://doi.org/10.4103/sja.SJA_203_17) PMID: 28616007
22. Anthoine E, Moret L, Regnault A, Sébille V, Hardouin J-B. Sample size used to validate a scale: a review of publications on newly-developed patient reported outcomes measures. *Health Qual Life Outcomes*. 2014; 12: 2. <https://doi.org/10.1186/s12955-014-0176-2> PMID: 25492701
23. Albert V, Coutu M-F, Durand M-J. [Psychometrics of the Eschelle questionnaire to measure self efficacy in work capacity]. *Can J Occup Ther*. 2011; 78: 311–317. <https://doi.org/10.2182/cjot.2011.78.5.6> PMID: 22338298
24. Albert V, Coutu M-F, Durand M-J. Internal consistency and construct validity of the Revised Illness Perception Questionnaire adapted for work disability following a musculoskeletal disorder. *Disability & Rehabilitation*. 2013; 35: 557–565. <https://doi.org/10.3109/09638288.2012.702849> PMID: 22889376
25. Somerson JS, Bartush KC, Shroff JB, Bhandari M, Zelle BA. Loss to follow-up in orthopaedic clinical trials: a systematic review. *Int Orthop*. 2016; 40: 2213–2219. <https://doi.org/10.1007/s00264-016-3212-5> PMID: 27142421
26. French DJ, Roach PJ, Mayes S. Peur du mouvement chez des accidentés du travail: L'Échelle de Kinésiophobie de Tampa (EKT). [Fear of movement in injured workers: The Tampa Scale of Kinesiophobia.]. *Canadian Journal of Behavioural Science / Revue canadienne des sciences du comportement*. 2002; 34: 28–33. <https://doi.org/10.1037/h0087152>
27. Weermeijer JD, Meulders A. Clinimetrics: Tampa Scale for Kinesiophobia. *Journal of Physiotherapy*. 2018; 64: 126. <https://doi.org/10.1016/j.jphys.2018.01.001> PMID: 29567379
28. Vlaeyen JW, Kole-Snijders AM, Boeren RG, van Eek H. Fear of movement/(re)injury in chronic low back pain and its relation to behavioral performance. *Pain*. 1995; 62: 363–372. [https://doi.org/10.1016/0304-3959\(94\)00279-N](https://doi.org/10.1016/0304-3959(94)00279-N) PMID: 8657437
29. French DJ, Noël M, Vigneau F, French JA, Cyr CP, Evans RT. L'Échelle de dramatisation face à la douleur PCS-CF: Adaptation canadienne en langue française de l'échelle «Pain Catastrophizing Scale». [PCS-CF: A French-language, French-Canadian adaptation of the Pain Catastrophizing Scale.]. *Canadian Journal of Behavioural Science / Revue canadienne des sciences du comportement*. 2005; 37: 181–192. <https://doi.org/10.1037/h0087255>
30. Osman A, Barrios FX, Kopper BA, Hauptmann W, Jones J, O'Neill E. Factor structure, reliability, and validity of the Pain Catastrophizing Scale. *Journal of Behavioral Medicine*. 1997; 20: 589–605. <https://doi.org/10.1023/a:1025570508954> PMID: 9429990
31. Tremblay I, Beaulieu Y, Bernier A, Crombez G, Laliberté S, Thibault P, et al. Pain Catastrophizing Scale for Francophone Adolescents: a preliminary validation. *Pain Res Manag*. 2008; 13: 19–24. <https://doi.org/10.1155/2008/845674> PMID: 18301812
32. Osman A, Barrios FX, Gutierrez PM, Kopper BA, Merrifield T, Grittmann L. The Pain Catastrophizing Scale: further psychometric evaluation with adult samples. *J Behav Med*. 2000; 23: 351–365. <https://doi.org/10.1023/a:1005548801037> PMID: 10984864
33. Sullivan MJ. The Pain Catastrophizing Scale. 2009; 36.
34. Roberge P, Doré I, Menear M, Chartrand É, Ciampi A, Duhoux A, et al. A psychometric evaluation of the French Canadian version of the Hospital Anxiety and Depression Scale in a large primary care population. *Journal of Affective Disorders*. 2013; 147: 171–179. <https://doi.org/10.1016/j.jad.2012.10.029> PMID: 23218249
35. Bocéréan C, Dupret E. A validation study of the Hospital Anxiety and Depression Scale (HADS) in a large sample of French employees. *BMC Psychiatry*. 2014; 14: 354. <https://doi.org/10.1186/s12888-014-0354-0> PMID: 25511175

36. Garcia KKS, Abrahão AA. Research Development Using REDCap Software. *Healthc Inform Res.* 2021; 27: 341–349. <https://doi.org/10.4258/hir.2021.27.4.341> PMID: 34788915
37. Streiner DL, Norman GR, Cairney J. *Health measurement scales: A practical guide to their development and use*, 5th ed. New York, NY, US: Oxford University Press; 2015. pp. xiii, 399. <https://doi.org/10.1093/med/9780199685219.001.0001>
38. Wind H, Gouttebauge V, Kuijjer PPFM, Frings-Dresen MHW. Assessment of functional capacity of the musculoskeletal system in the context of work, daily living, and sport: a systematic review. *J Occup Rehabil.* 2005; 15: 253–272. <https://doi.org/10.1007/s10926-005-1223-y> PMID: 15844681
39. Gutiérrez-Sánchez D, Roldán-Jiménez C, Pajares B, Alba E, Cuesta-Vargas AI. Validity and reliability of the Spanish fear-avoidance components scale in breast cancer survivors. *European Journal of Cancer Care.* 2021; 30: e13506. <https://doi.org/10.1111/ecc.13506> PMID: 34423870
40. Turan K, Sari Z, Özden F. Psychometric properties of the Turkish version of the fear avoidance components scale in patients with chronic pain related to musculoskeletal disorders. *Wien Klin Wochenschr.* 2023. <https://doi.org/10.1007/s00508-023-02224-1> PMID: 37278855
41. Pérez-Cruzado D, Roldan-Jimenez C, Iglesias-Campos M, Pajares B, Alba E, Cuesta-Vargas A. Validation of pain catastrophizing scale on breast cancer survivor. *Pain Pract.* 2022; 22: 711–717. <https://doi.org/10.1111/papr.13163> PMID: 36136052
42. Pincus T, Vogel S, Burton AK, Santos R, Field AP. Fear avoidance and prognosis in back pain: a systematic review and synthesis of current evidence. *Arthritis Rheum.* 2006; 54: 3999–4010. <https://doi.org/10.1002/art.22273> PMID: 17133530
43. Brindisino F, Garzonio F, Di Giacomo G, Pellegrino R, Olds M, Ristori D. Depression, fear of re-injury and kinesiophobia resulted in worse pain, quality of life, function, and level of return to sport in patients with shoulder instability. A systematic review. *J Sports Med Phys Fitness.* 2022. <https://doi.org/10.23736/S0022-4707.22.14319-7>
44. Sloan E, Hall K, Moulding R, Bryce S, Mildred H, Staiger PK. Emotion regulation as a transdiagnostic treatment construct across anxiety, depression, substance, eating and borderline personality disorders: A systematic review. *Clin Psychol Rev.* 2017; 57: 141–163. <https://doi.org/10.1016/j.cpr.2017.09.002> PMID: 28941927
45. Abma IL, Rovers M, van der Wees PJ. Appraising convergent validity of patient-reported outcome measures in systematic reviews: constructing hypotheses and interpreting outcomes. *BMC Res Notes.* 2016; 9: 226. <https://doi.org/10.1186/s13104-016-2034-2> PMID: 27094345
46. French DJ, France CR, Vigneau F, French JA, Evans RT. Fear of movement/(re)injury in chronic pain: a psychometric assessment of the original English version of the Tampa scale for kinesiophobia (TSK). *Pain.* 2007; 127: 42–51. <https://doi.org/10.1016/j.pain.2006.07.016> PMID: 16962238
47. Djukanovic I, Carlsson J, Årestedt K. Is the Hospital Anxiety and Depression Scale (HADS) a valid measure in a general population 65–80 years old? A psychometric evaluation study. *Health Qual Life Outcomes.* 2017; 15: 193. <https://doi.org/10.1186/s12955-017-0759-9> PMID: 28978356
